# Supplementary material for: Cholesterol Biosynthesis Modulates CSFV Replication
Source: MDPI journal article supplement (doi:10.3390/v14071450), 2022-06-30
Supplement: s1 [file s1]

## Supplementary Information

**Table S1:** The primers used in qPCR are listed in table.

| Primers    | Sequences (5' to 3')                            | Amplicon (bp) |
|------------|-------------------------------------------------|---------------|
| CSFV-RT    | CTAGCCATGCCCACAGTAGGA<br>CTCCATGTGCCATGTACAGCA  | 286           |
| APOH-RT    | CAGTTTCACTTGCAACCGGG<br>TCCAAACATTGCGTGCTGTG    | 229           |
| ABCA1-RT   | CGACAATGTGGAGAGGACGAA<br>GCCAGTTTTCTTCTCCATACCC | 169           |
| APOE-RT    | CACCGAGGACCTGCAGAAG<br>CAACTGGCTGCCCTGCTC       | 223           |
| DHCR24-RT  | CGGCAAGTCCTCAAGTCCTC<br>AGTCCCTGAGTACCCACAGT    | 132           |
| DHCR7-RT   | TGTGGTTCGCTAACTCCCAC<br>ATCATGGCGAAGGTGGAGAC    | 121           |
| FDFT1-RT   | AGTTCTACAATCTGCTGCGCT<br>CTGGATAACGGCTGCGAAAC   | 143           |
| HMGCS1-RT  | GAGCCGTGCCAAGTTGCG<br>CAGCAGCTACACCGTCGTATT     | 275           |
| HMGCR-RT   | TCGCAGATGGCATGACTCGT<br>CTGACCTGGACTGGAAACGG    | 204           |
| HSD17B7-RT | TGGACTTCACCTGTGCTTGG<br>GAACACCGATGACAAGCTGC    | 133           |
| LIPG-RT    | TCTATTGCTGTTTTGCGGCG<br>ATGCCACTCATCGTCCATCC    | 253           |
| SREBP2-RT  | AGGTCCCGTTACCTTCCTTCT<br>GTCACCAGGCTTTGGACTTG   | 289           |
| IRF3-RT    | ACACCCTCTGGTTCTGCATG<br>GGCTGTTGGAAATGTGCAGG    | 171           |
| IRF7-RT    | GACTTCGGCACCTTCTTCCA<br>AGGACGAGGCTCTTCTCCTT    | 134           |
| CCL2-RT    | AGAAGATCTCGATGCAGCGG<br>TTCTGCTTGGGTCTGCACA     | 121           |
| CXCL10-RT  | CTCTCCAGAACTGTTGCTGT<br>TCAACATGTGGGCAAGATTGAC  | 113           |
| IFNB1-RT   | TGGCAITGCAGAAGCTCCTG<br>ATGCCGAAGATCTGCTGGAG    | 163           |
| MX1-RT     | ATCTCCAGCCACATCCCTCT<br>CTCTTGTCGCTGGTGTCACT    | 146           |
| MX2-RT     | AACGGACCGTCTCCTGTTTC<br>TGAATGGGATCTGGTTGGCC    | 100           |
| GAPDH-RT   | ATCCTGGGCTACACTGAGGA<br>TGTCGTACCAGGAAATGAGCT   | 146           |

**Table S2:** The primary and secondary antibodies are listed in table.

| Antibodies                                  | Host   | Dilutions | Supplier    |
|---------------------------------------------|--------|-----------|-------------|
| CSFV Envelope glycoprotein E2 Antibody      | Rabbit | 1:1000    | Bioss       |
| LDLR Monoclonal antibody                    | Mouse  | 1:1000    | Proteintech |
| Anti-PCSK9 Antibody                         | Rabbit | 1:1000    | BOSTER      |
| Phospho-TBK1/NAK Antibody                   | Rabbit | 1:1000    | Beyotime    |
| TBK1 Rabbit Polyclonal Antibody             | Rabbit | 1:1000    | Beyotime    |
| $\beta$ -Actin Mouse Monoclonal Antibody    | Mouse  | 1:1000    | Beyotime    |
| HRP-labeled Goat Anti-Mouse IgG(H+L)        | Goat   | 1:1000    | Beyotime    |
| HRP-labeled Goat Anti-Rabbit IgG(H+L)       | Goat   | 1:1000    | Beyotime    |
| Goat Anti-Rabbit IgG H&L (Alexa Fluor® 488) | Goat   | 1:1000    | Abcam       |

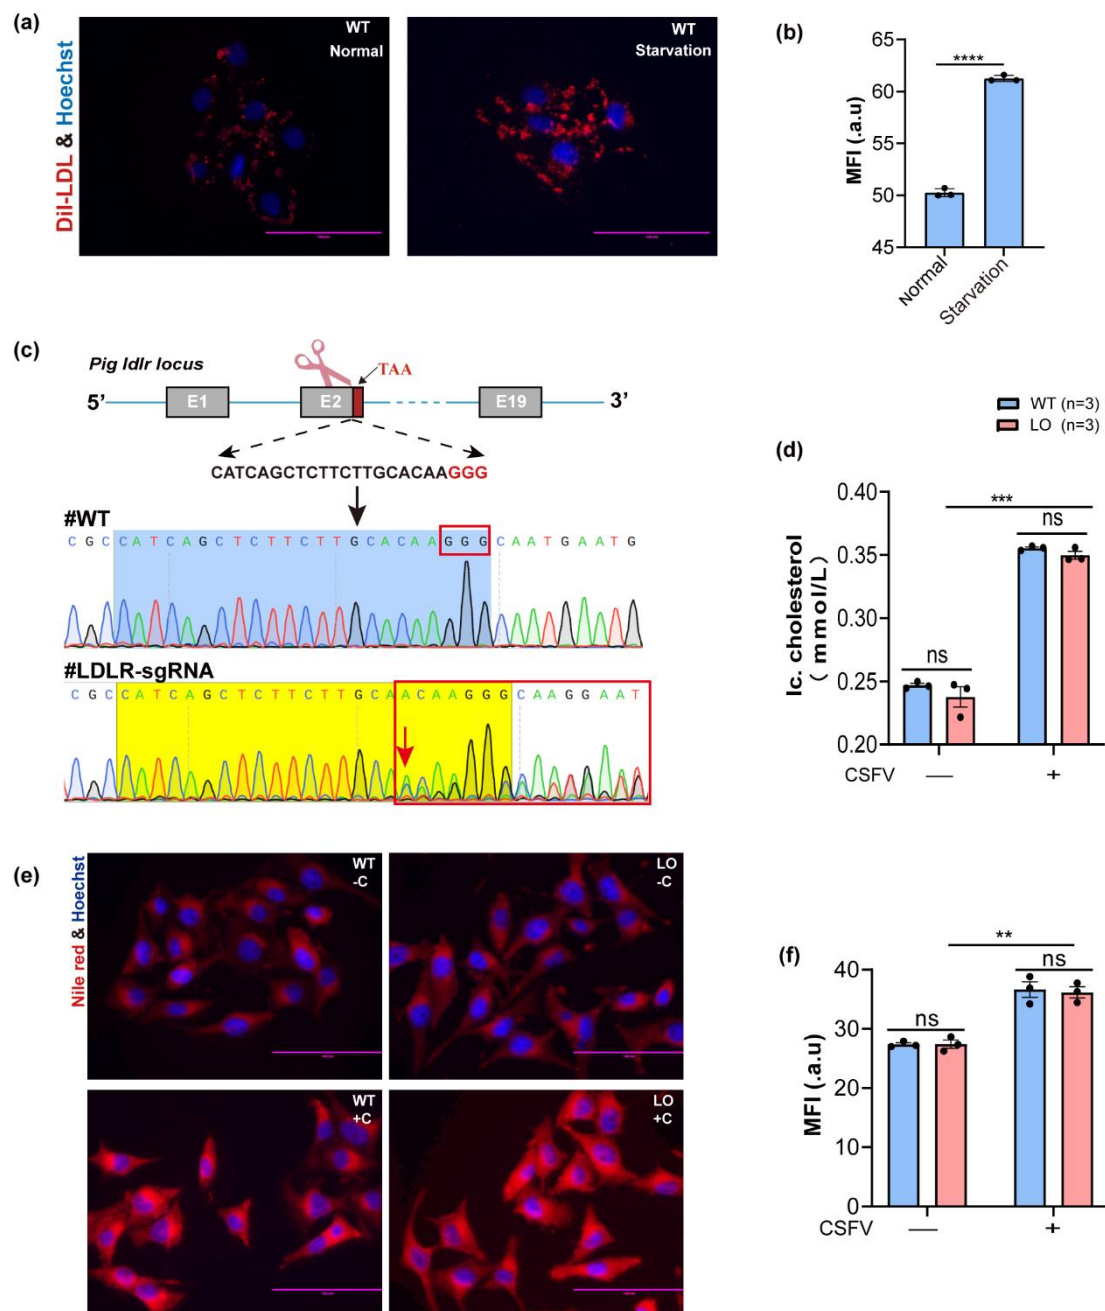

**Figure S1. (a–b)** Starvation treatment increased dil-LDL uptake,  $n = 3$ , \*\*\*\* $p < 0.0001$ . **(c)** Construction and efficiency detection of LDLR-KO gene editing system. **(d–f)** The disruption of LDLR had no any effect on intracellular cholesterol levels,  $n = 3$ , \*\* $p < 0.01$ , \*\*\* $p < 0.001$ . (WT, wild-type; LO, *ldlr*-ko; MFI, mean fluorescent intensity)

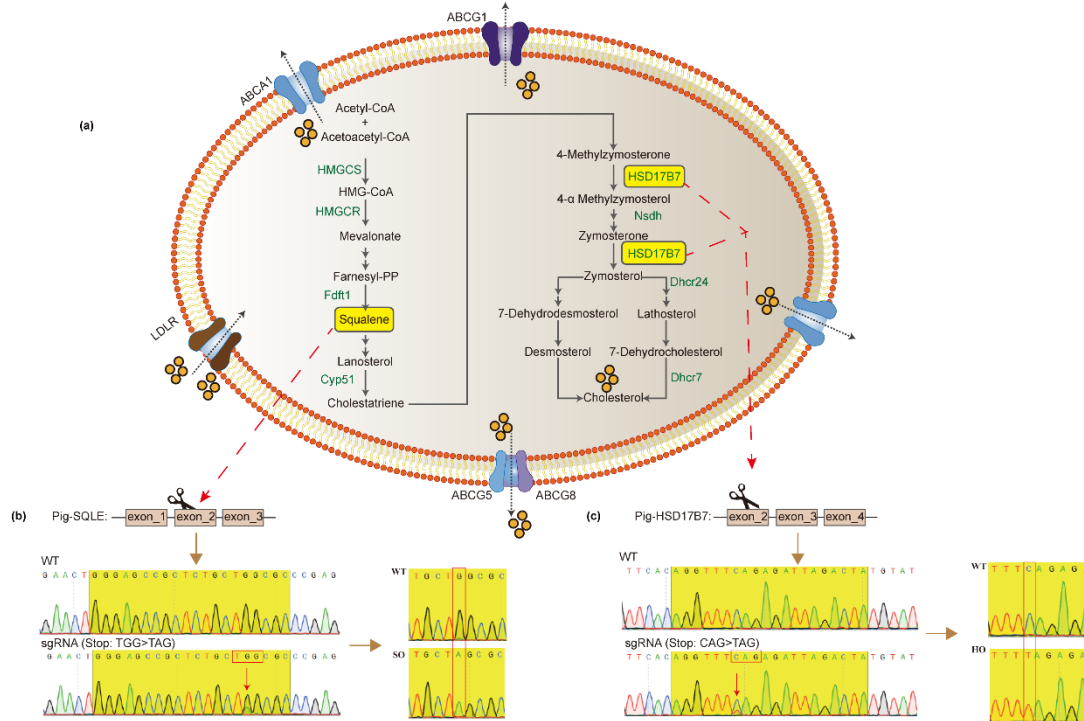

**Figure S2. (a)** Cholesterol biosynthesis schematic diagram. **(b–c)** Construction and efficiency detection of *SQLE* and *HSD17B7* gene editing system.

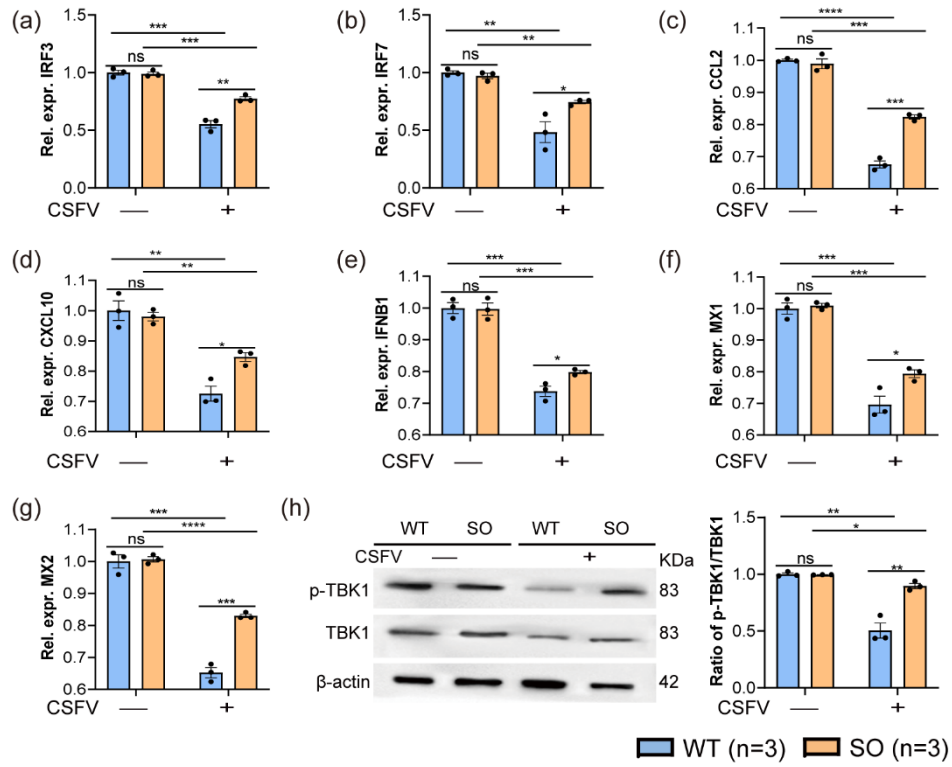

**Figure S3. (a–h)** The expression of ISGs and p-TBK1 was decreased in CSFV-infected PK-15 cells, and the disruption of cholesterol biosynthesis obviously enhanced type I IFN signaling,  $n = 3$ ,  $*p < 0.05$ ,  $**p < 0.01$ ,  $***p < 0.001$ ,  $****p < 0.0001$ . (WT, wild-type; SO, sqle-ko; Rel. expr, relative expression)
